# Supplementary material for: Dietary Sources of Anthocyanins and Their Association with Metabolome Biomarkers and Cardiometabolic Risk Factors in an Observational Study
Source: MDPI journal article supplement (doi:10.3390/nu15051208), 2023-02-28
Supplement: s1 [file s1]

**Supplementary Table S2.** Dietary characteristics of the MAX study population according to tertiles of dietary ACN intake.

|                                       | All<br>n= 624<br>k=1,353 | Tertile 1<br><0.29 mg ACN/day | Tertile 2<br>0.29-8.9 mg<br>ACN/day | Tertile 3<br>>8.9 mg<br>ACN/day |
|---------------------------------------|--------------------------|-------------------------------|-------------------------------------|---------------------------------|
| <b>Dietary characteristics</b>        |                          |                               |                                     |                                 |
| Energy (10 <sup>3</sup><br>kcal/d)*** | 2.1 ±0.8                 | 1.9 ±0.8                      | 2.1 ±0.8                            | 2.2 ±0.8                        |
| SFA (g/d)*                            | 27 ±15                   | 25 ±15                        | 28 ±15                              | 28 ±16                          |
| MUFA (g/d)***                         | 29 ±16                   | 27 ±16                        | 31 ±16                              | 30 ±16                          |
| PUFA (g/d)**                          | 14 ±7                    | 13 ±8                         | 15 ±7                               | 14 ±7                           |
| Total sugars<br>(g/d)***              | 73 ±50                   | 58 ±42                        | 77 ±46                              | 73 ±50                          |
| Sucrose (g/d)*                        | 35 ±32                   | 31 ±31                        | 37 ±34                              | 37 ±35                          |
| Protein (g/d)*                        | 88 ±40                   | 83 ±39                        | 88 ±36                              | 91 ±44                          |
| Dietary fiber<br>(g/d)**              | 22 ± 11                  | 20 ± 11                       | 24 ± 11                             | 22 ± 11                         |
| Alcohol (g/d)***                      | 0 (0 - 13.2)             | 0 (0-0)                       | 0 (0-9.3)                           | 9.5 (0-28.5)                    |
| Sodium (g/d)                          | 3.04 ± 1.7               | 2.96 ±1.8                     | 3.09 ±1.6                           | 3.03 ±1.7                       |
| <b>Food intake</b>                    |                          |                               |                                     |                                 |
| Cereal whole grain<br>(g/d)           | 115 (45-200)             | 105 (35-205)                  | 125 (60-213)                        | 110 (45-190)                    |
| Cereal refined<br>(g/d)               | 0 (0-80)?                | 0 (0-90)                      | 0 (0-80)                            | 0 (0-61)                        |
| Fruits (g/d)***                       | 150 (0-313)              | 0 (0-120)                     | 150 (0-250)                         | 110 (0-229)                     |
| Berries (g/d)***                      | 0 (0-10)                 | 0 (0-0)                       | 0 (0-6.5)                           | 10 (0-35)                       |
| Vegetables (g/d)                      | 140 (30-290)             | 190 (60-360)                  | 210 (60-394)                        | 247 (98-400)                    |
| Legumes (g/d)                         | 0 (0-0)                  | 0 (0-0)                       | 0 (0-0)                             | 0 (0-0)                         |
| Nuts and seeds<br>(g/d)               | 0 (0-10)                 | 0 (0-1.5)                     | 0 (0-15)                            | 0 (0-15)                        |

SFA: Saturated fatty acids; MUFA: monounsaturated fatty acids; PUFA: polyunsaturated fatty acids. \*p for trend<0.05, \*\* p for trend<0.01, \*\*\* p for trend<0.001 using age- and sex-adjusted generalized linear models. Variables with skewed distribution were log-transformed before entering the analyses.
